# Supplementary material
Source: PubMed Central journal article supplement (PMC6542254)
Supplement: jgv-97-2668-s001.pdf [file jgv-97-2668-s001.pdf]

**Supplementary Table 1. Primers used in plasmid construction**

| Aim                   | Primer       | Sequence (5'-3')*                                                | Restriction site              |
|-----------------------|--------------|------------------------------------------------------------------|-------------------------------|
| 1.3mer                | P1-21-F      | tatc <b>gaattc</b> caactgcccctccaaga                             | EcoRI                         |
|                       | P1928-1948-R | acgc <b>gtcgac</b> gagtaactccacagtagctcc                         | SaII                          |
|                       | P980-1004-F  | cggc <b>gagctc</b> ggaaagtatgtcaaagaattgtggg                     | SacI                          |
|                       | P3203-3221-R | gc <b>aggaattc</b> caactgcatggcctgag                             | EcoRI                         |
| X-Truncated           | Pc1684g-F    | agcaatgtgaacgaccgacc                                             |                               |
|                       | Pc1684g-R    | ggtcggctgctc <u>acattgct</u>                                     |                               |
| C-minus               | Pc2044a-F    | tgagcattgatcacctcacc                                             |                               |
|                       | Pc2044a-R    | ggtgaggtgat <u>caatgctca</u>                                     |                               |
| pUC18<br>modify       | p1-p(a)-f    | cct <b>gagctc</b> tctgtgccttctagttgccag                          | AatII                         |
|                       | P1-p(a)-r    | <b>acgcgt</b> caatt <b>gagatc</b> ccatagagcccaccgcatc            | MluI, BglII                   |
|                       | p2-p(a)-f    | tgg <b>agatc</b> tcaatt <b>acgcgtggtaccaagct</b> taagttaaac      | BglII, MluI,<br>KpnI, HindIII |
|                       | P2-p(a)-r    | ctc <b>acatgtc</b> catagagcccaccgcat                             | PciI                          |
| CMV-pg                | Pf1-2nt      | caggg <b>agctct</b> tctgg <b>acgcgt</b> aacttttcacctctgccta      | SacI, MluI                    |
|                       | Pr1          | gat <b>aggtacc</b> aggcaaaaacgagagtaactcc                        | KpnI                          |
|                       | Pm-1         | cctctgggattctttcccg                                              |                               |
|                       | P6.2m-2      | tactgttctgaactggagcc                                             |                               |
|                       | p21.2m2      | aggttggtgagtgattggagg                                            |                               |
| CMV-Lrna              | pL6.2-F      | caggg <b>agctct</b> tctggct <b>acgcgt</b> tattttgcgggtcaccatattc | SacI, MluI                    |
|                       | pL21.2-F     | caggg <b>agctct</b> tctggct <b>acgcgt</b> tattttgtgggtcaccatattc | SacI, MluI                    |
| CMV-Srna              | PS6.2-F      | caggg <b>agctct</b> tctgg <b>acgcgt</b> caactgcctccaccaagct      | SacI, MluI                    |
|                       | PS21.2-F     | caggg <b>agctct</b> tctgg <b>acgcgt</b> ccacaacttccacaaac        | SacI, MluI                    |
| DIG Probe<br>template | X-F          | gctc <b>ggtac</b> cccatactgcggaactcc                             | KpnI                          |
|                       | X-R          | catgctc <b>gagc</b> gagagtaactccacag                             | XhoI                          |
|                       | gapDH-f      | gctc <b>ggtacc</b> gatttggtctgattgggc                            | KpnI                          |
|                       | gapDH-r      | catgctc <b>gagc</b> tcttgaggccatgt                               | XhoI                          |

\* Restriction sites are in bold. Underlined base is point mutation.
